# Supplementary material
Source: PubMed Central journal article supplement (PMC5559273)
Supplement: NIHMS893215-supplement-Supplemental_Material.pdf [file NIHMS893215-supplement-Supplemental_Material.pdf]

# Supplementary Information

## SHANK3 and IGF1 restore synaptic deficits in neurons from 22q13 deletion syndrome patients

Aleksandr Shcheglovitov, Olesya Shcheglovitova, Masayuki Yazawa, Thomas Portmann, Rui Shu, Vittorio Sebastiano, Anna Krawisz, Wendy Froehlich, Jonathan A. Bernstein, Joachim Hallmayer, Ricardo E. Dolmetsch

|                         |                                                                                  |
|-------------------------|----------------------------------------------------------------------------------|
| Supplementary Figure 1  | <b>Verification of deletion in cells from PMDS patients</b>                      |
| Supplementary Figure 2  | <b>Characterization of iPS cells</b>                                             |
| Supplementary Figure 3  | <b>Neural differentiation protocol</b>                                           |
| Supplementary Figure 4  | <b>Expression of neuronal cell markers</b>                                       |
| Supplementary Figure 5  | <b>Characterization of single cell gene expression profiles</b>                  |
| Supplementary Figure 6  | <b>Characterization of iPS cell-derived neurons expressing CaMKII-GFP</b>        |
| Supplementary Figure 7  | <b>Map2 expression in cultures in iPS cell-derived neurons</b>                   |
| Supplementary Figure 8  | <b>Voltage deflections induced by GABA application</b>                           |
| Supplementary Figure 9  | <b>Currents induced by GABA application</b>                                      |
| Supplementary Figure 10 | <b>Expression of SHANK3 proteins at different stages of differentiation</b>      |
| Supplementary Figure 11 | <b>Characterization of SHANK3 expression in infected PMDS neurons</b>            |
| Supplementary Figure 12 | <b>Characterization of inhibitory synaptic transmission after IGF1 treatment</b> |
| Supplementary Figure 13 | <b>Measurements of input resistance</b>                                          |
| Supplementary Figure 14 | <b>Currents induced by NMDA and AMPA applications after IGF1 treatment</b>       |
| Supplementary Figure 15 | <b>Characterization of SHANK3 expression after IGF1 treatment</b>                |
| Supplementary Figure 16 | <b>Localization of SHANK3 and PSD95 proteins in human neurons</b>                |
| Supplementary Table 1   | <b>Characterization of PMDS patients</b>                                         |
| Supplementary Table 2   | <b>Summary of MLPA assay</b>                                                     |
| Supplementary Table 3   | <b>Summary of performed experiments</b>                                          |
| Supplementary Table 4   | <b>Characterization of functional properties of iPSC-derived neurons</b>         |
| Supplementary Table 5   | <b>List of primers used for qRT-PCR</b>                                          |
| References              |                                                                                  |

# Supplementary Figure 1

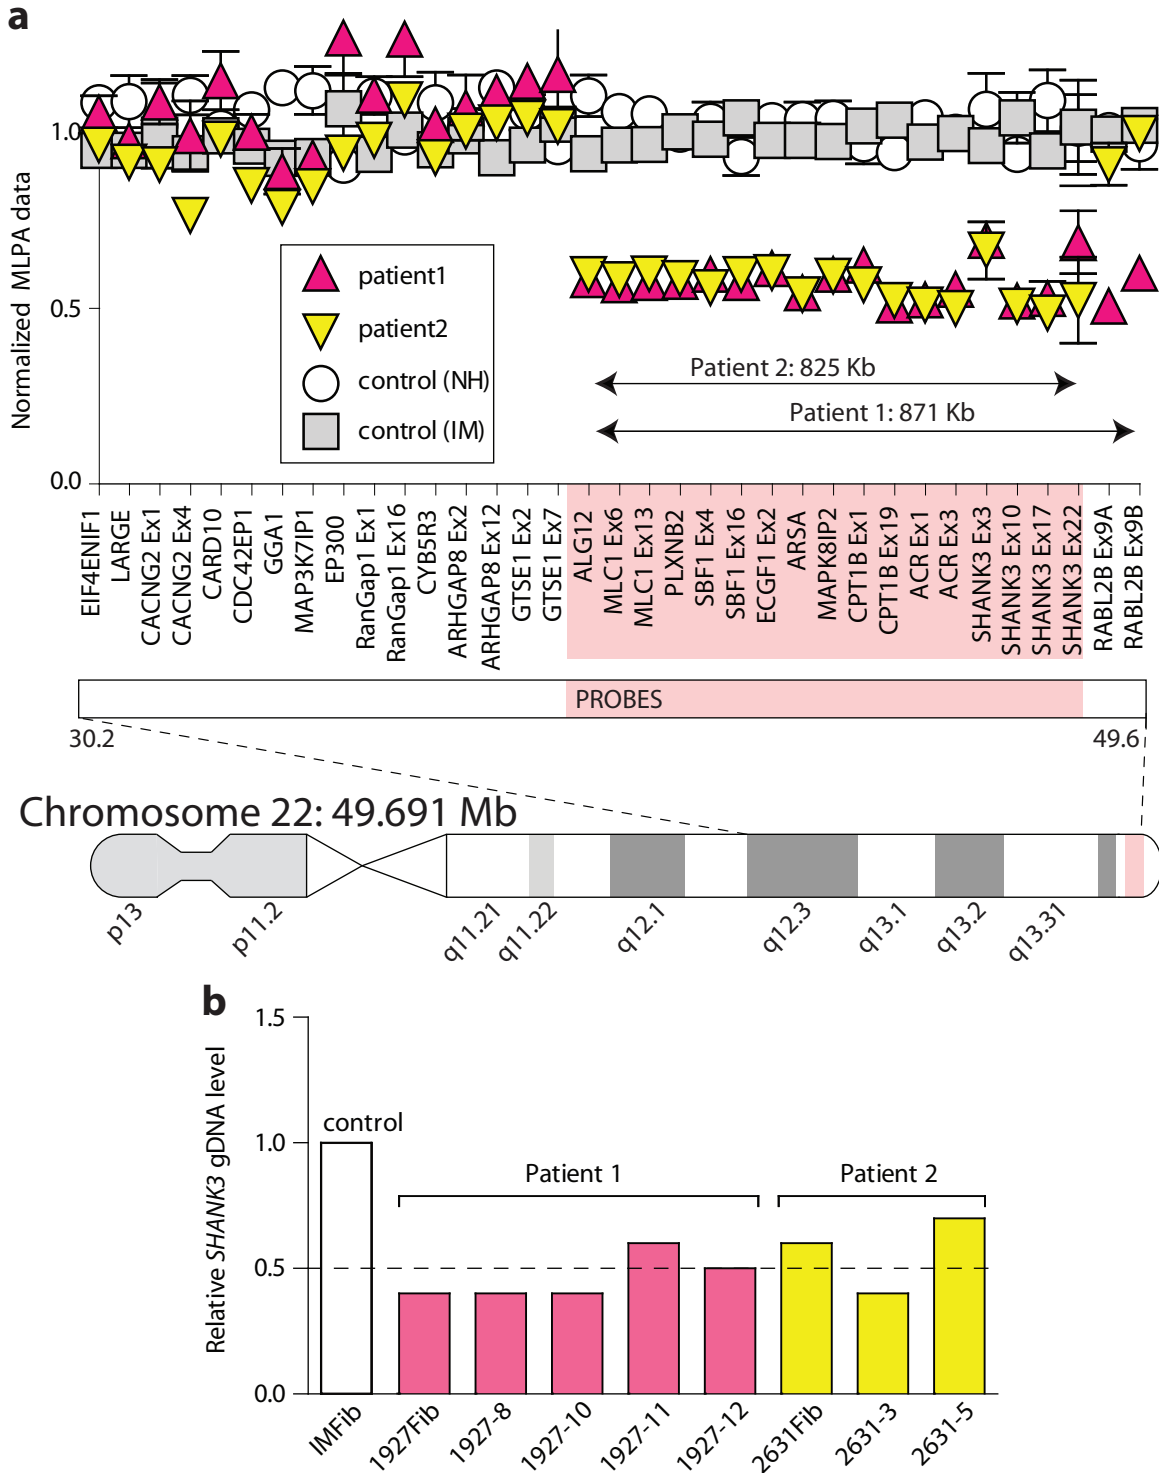

**Verification of deletions in cells from PMDS patients.** **a**, Multiplex Ligation Probe Amplification Assay (MLPA) on patient and control gDNA demonstrates the haploinsufficiency of genes from patients with 22q13 deletions, top. Graphical representation of Chromosome 22 and the region covered by the MLPA probes, bottom. The minimum deleted region is shown in red. MLPA was performed following the manufacturer's protocol (SALSA MLPA kit P188-B1 22q13; MRC-Holland, Amsterdam, Netherlands). Data were acquired using a capillary sequencer and normalized by dividing the peak area of each probe's amplification product by the total area of the reference probes ( $n = 3 - 10$  gDNA extracts). Data presented as means  $\pm$  s.e.m. Probe positions are based on the NCBI36/hg18 genome assembly (<http://genome.ucsc.edu/>). **b**, Reduced level of *SHANK3* gDNA detected in patients' fibroblasts and iPS cells using qPCR with *SHANK3ex22* primers (normalized to 18S).

## Supplementary Figure 2

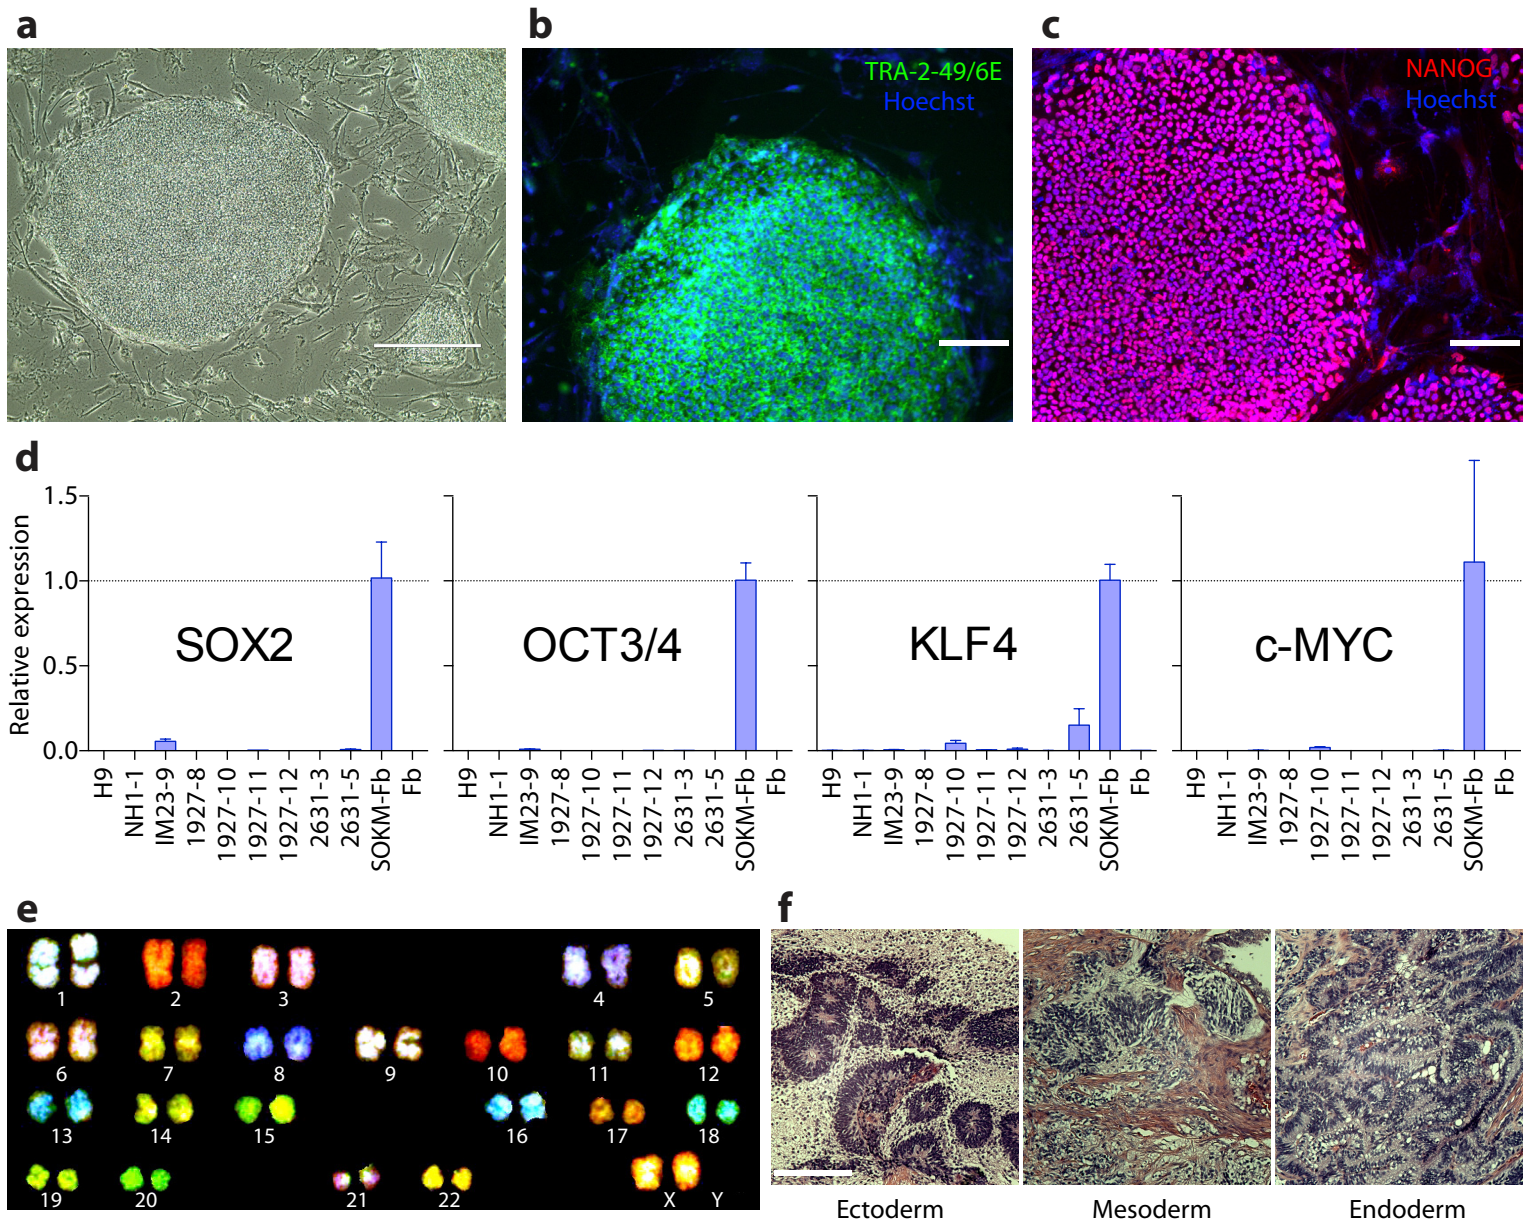

**Characterization of iPS cells.** **a**, Representative images of PMDS iPS cell colonies (1927-8; scale bar, 400  $\mu$ m). **b-c**, Representative images of PMDS iPS cell colony immunostained with Tra-2-49/6E (**b**; 2631-5; scale bar, 200  $\mu$ m) and Nanog (**c**; 1927-10; scale bar, 200  $\mu$ m). **d**, qRT-PCR detection of expression of exogenous transcription factors (SOX2, OCT3/4, KLF4, and c-MYC) introduced during reprogramming. Negative control, H9-ESC line; positive control, SOMK-Fb-IMR90 human fibroblasts (ATCC: CCL-186) infected with the four transcription factors. Normalized to GAPDH and expression levels in SOMK-Fb. Data presented as means  $\pm$  s.d. Representative image of spectral karyogram derived from PMDS iPS cells (1927-8). **f**, Representative images of teratoma sections formed 3-8 weeks after injection of iPS cells into a kidney capsule of SCID mice (2631-3; Scale bar, 200  $\mu$ m).



## Supplementary Figure 3

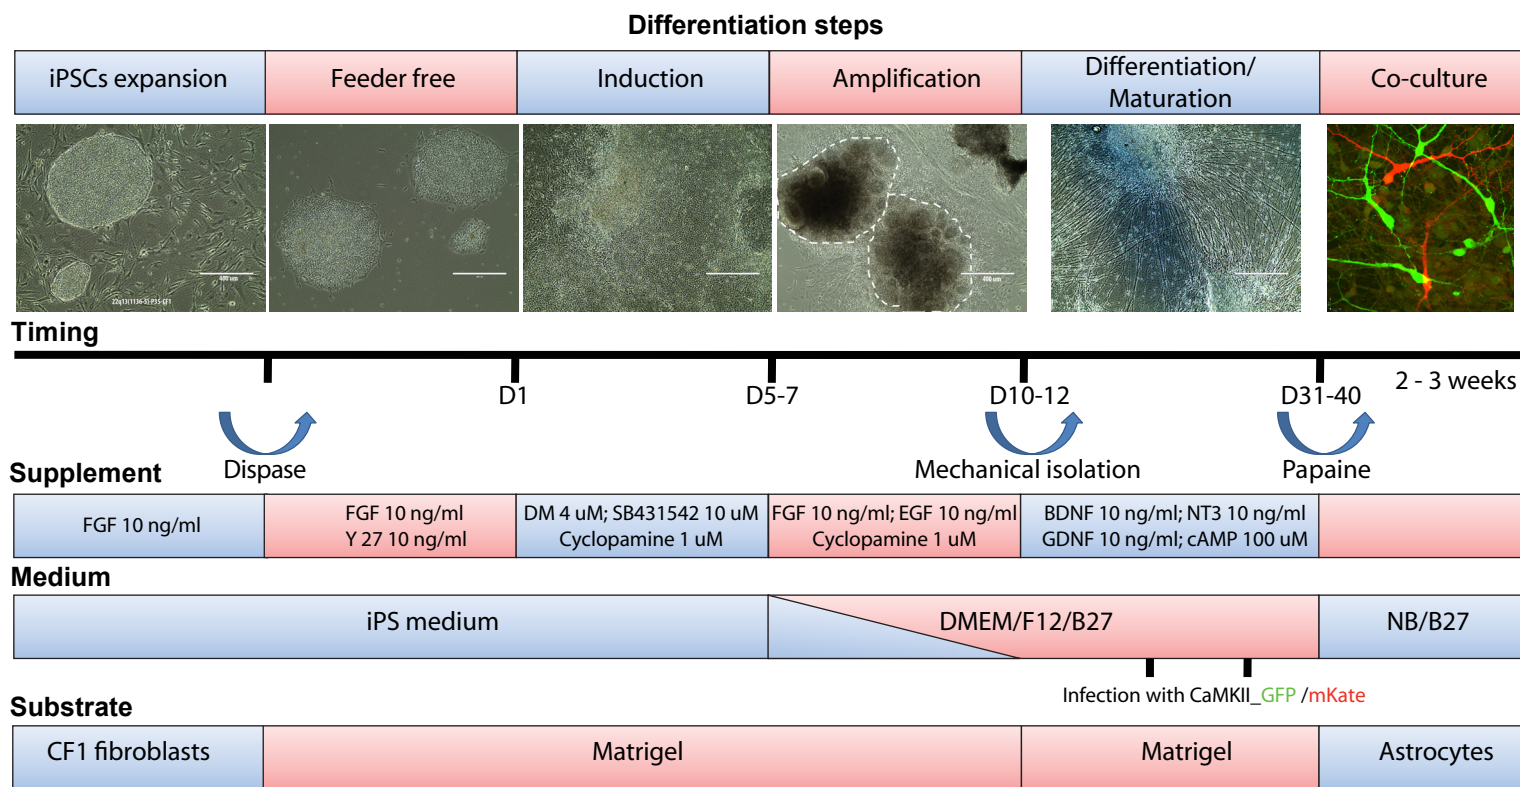

**Neural differentiation protocol.** We used a combination of two previously published protocols (Chambers et al., 2009; Gaspard et al., 2010). The protocol developed by Chambers et al., was chosen based on its effectiveness in converting iPS cells into largely FoxG1/Pax6-positive telencephalic neuronal precursors. A cyclopamine treatment step was introduced based on the protocol by Gaspard et al., where authors used cyclopamine to efficiently convert mouse ES cells into cortical excitatory neurons.

iPS cells were cultured in iPS-medium supplemented with bFGF (R&D Systems) on top of CF1 feeder cells and used for neural differentiation between passages 20 and 60. iPS cell colonies were then re-plated onto 2 cm dishes pre-coated with matrigel (BD, 1:20 in iPS media) and allowed to reach approximately 60–80% confluence in standard iPS medium. On day 1 (D1), growth factors were withdrawn and neuroectodermal fate was induced by a 5-7-day-long incubation in iPS-medium containing inhibitors of SMAD signaling, SB431542 (Tocris), and Dorsomorphin (Tocris), in the presence of cyclopamine (Calbiochem). On day 5-7, medium was changed to that containing a mixture of iPS and neuronal medium (DMEM/F12, 2% B27 (Chen et al., 2008), 1% penicillin-streptomycin) at the following ratios (iPS/neuronal) for each day: D1, 75/25; D2, 50/50; D3, 25/75; and D4: 0/100, and supplemented with bFGF and EGF (R&D Systems), and cyclopamine. On day 10-12, clusters with rosettes were mechanically isolated and transferred onto 2 cm dishes pre-coated with matrigel (1:20 in neuronal medium) and cultured in neuronal medium supplemented with cAMP (Tocris), BDNF (R&D Systems), NT3 (R&D Systems), and GDNF (R&D Systems) for the next 21-28 days. During this time, cells were infected with lentiviruses carrying GFP or mKate under the CaMKII $\alpha$  promoter (constructs were made by in-frame substitution of GFP or mKate for ChR2 in Addgene plasmid 20944 (Zhang et al., 2007)). On day 31–40, PMDS and control cells expressing different fluorescent proteins were co-plated together at 2x10<sup>5</sup> cells/well in 24-well plates on the bed of neonatal rat cortical astrocytes grown on 15 mm glass cover slips in NB medium (NB medium, 10888-022, Gibco; 2% B27; 1% L-glutamine).



## Supplementary Figure 4

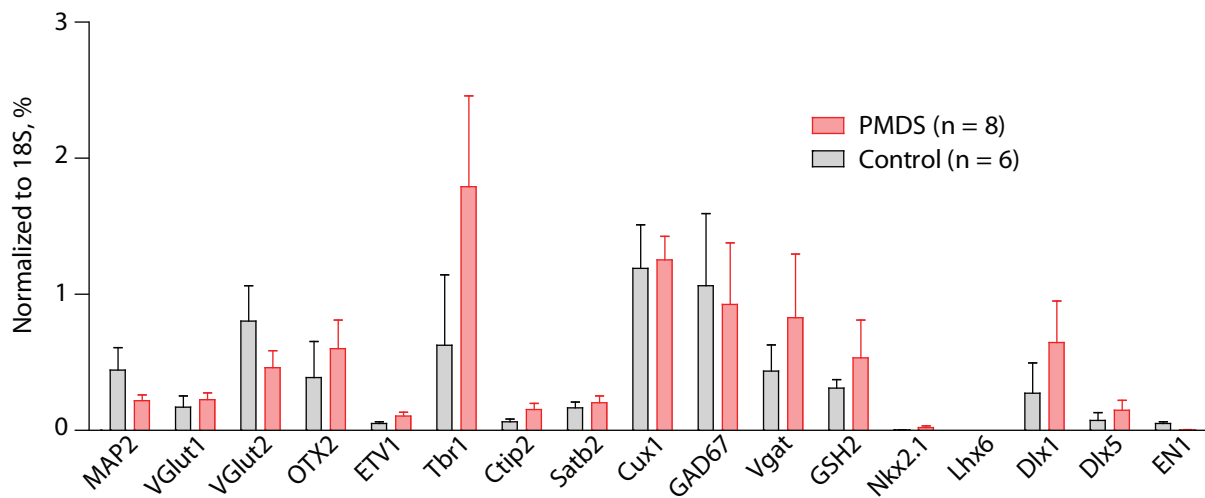

**Expression of neuronal cell markers.** mRNA expression level of different cell identity markers was assessed by qRT-PCR in cultures (D30 – D35) of PMDS (n = 8 biological replicates) and control (n = 6 biological replicates) iPS cell-derived neurons. Data are presented as means  $\pm$  s.e.m. There were no statistically significant differences between PMDS and control group means as determined by Student's t-test,  $p > 0.05$ .

# Supplementary Figure 5

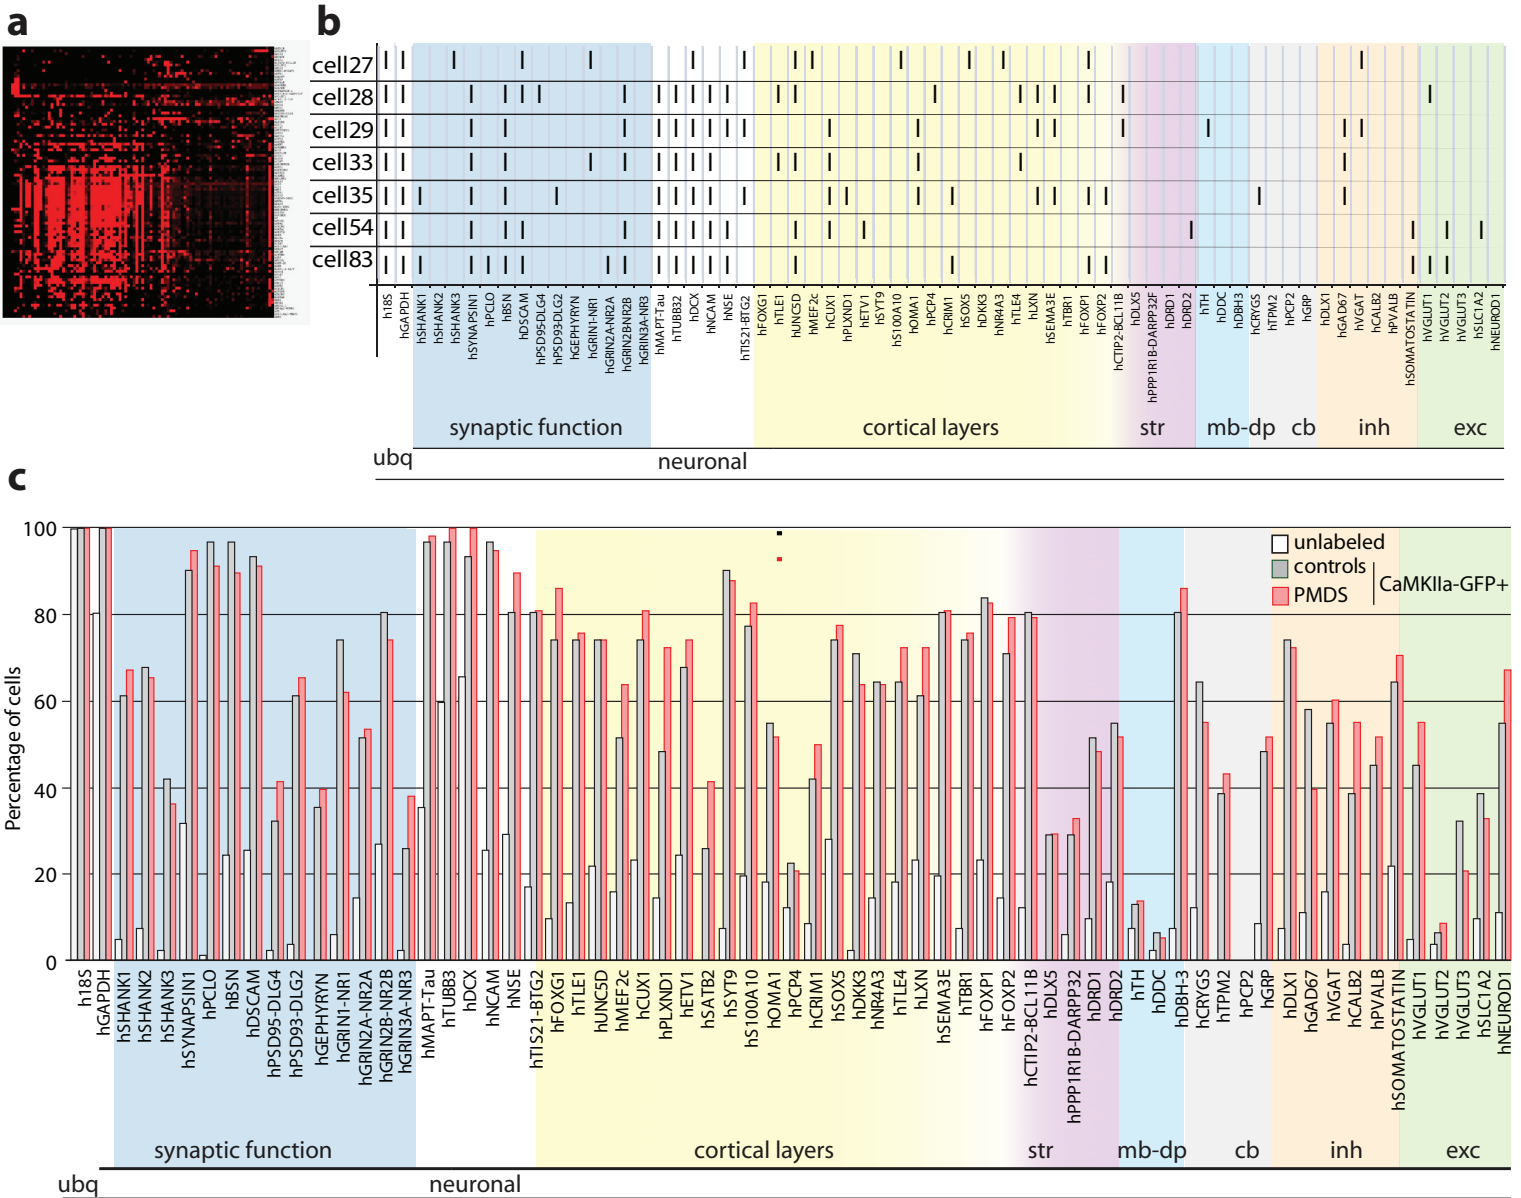

**Characterization of single cell gene expression profiles.** **a**, Heat map generated using Fluidigm Real-Time PCR Analysis 3.02 software, visualizing the expression of 96 selected genes (y-axis) in 96 single cells (x-axis). **b**, Representative analysis of the expression of selected genes in single cells, binarized based on the defined threshold for gene expression. **c**, Proportion of single cells expressing selected genes, collected either by random FACS clone sorting (unlabeled,  $n = 90$  cells from 1 line, D35) or based on CaMKII $\alpha$ -GFP expression (CaMKII $\alpha$ -GFP+,  $n = 32$  cells from 3 lines (control) and  $n = 58$  cells from 5 lines (PMDS), D30-D40). Proportion of single cells expressing SHANKS is also presented in Fig. 1b. Genes were grouped according to their apparent identities. Abbreviations: ubiquitously expressed genes (Ubq), genes preferentially expressed in excitatory (exc), inhibitory (inh), cerebellar (cb), midbrain dopaminergic (mb-dp), and striatal (str) neurons. There were no statistically significant differences between PMDS and control cells as determined by Fisher's exact test,  $p > 0.05$ . Significance tested with Fisher's exact test.

## Supplementary Figure 6

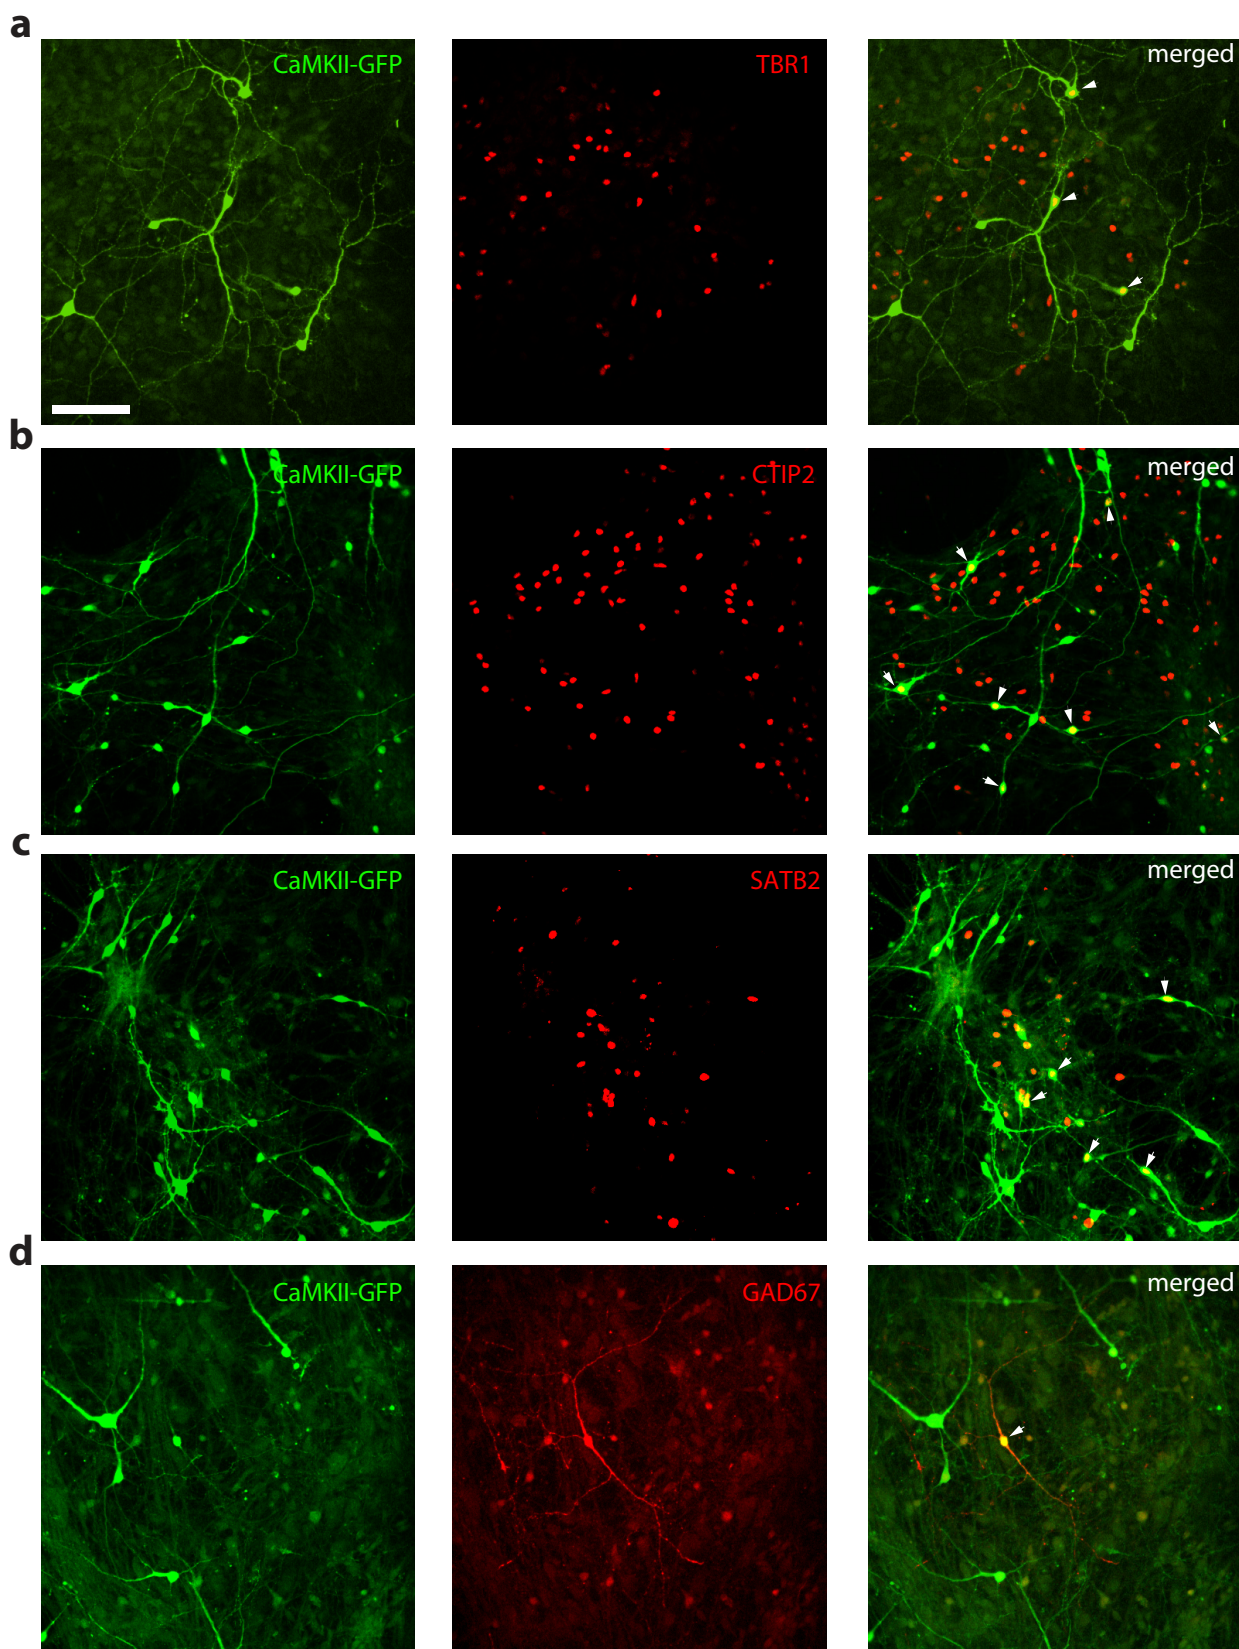

**Characterization of iPSC-derived neurons expressing CaMKII-GFP.** a-d, Representative images of control and PMDS iPSC-derived neurons immunostained with antibodies against GFP (green) and (a) TBR1, (b) CTIP2, (c) SATB2, and (d) GAD67 (red). Scale bar = 200  $\mu$ m.



## Supplementary Figure 7

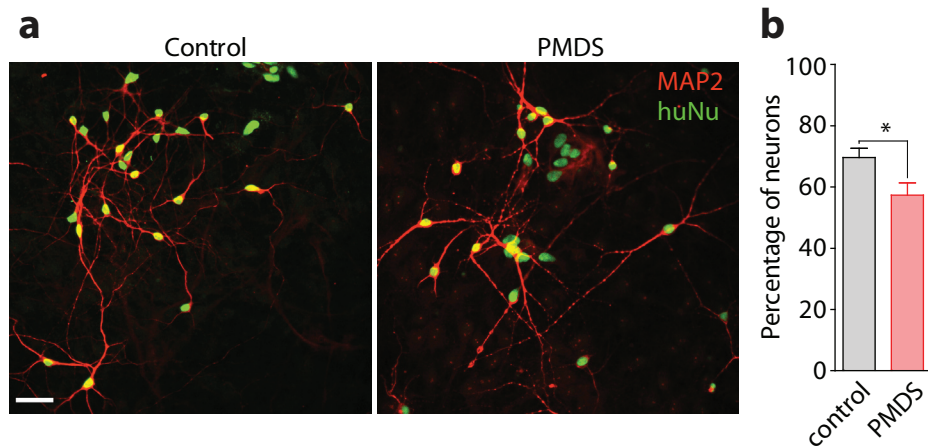

**Map2 expression in cultures in iPS cell-derived neurons.** **a**, Representative images of control and PMDS neurons immunostained with antibodies against MAP2 and human-specific nuclei. **b**, Proportion of neurons (MAP2 positive cells) among control ( $n = 8$  cover slips (26452 cells)) and PMDS ( $n = 7$  (19704)) cells plated on astrocytes. Data presented as means  $\pm$  s.e.m.; \*  $p = 0.02$  by Mann Whitney test.

## Supplementary Figure 8

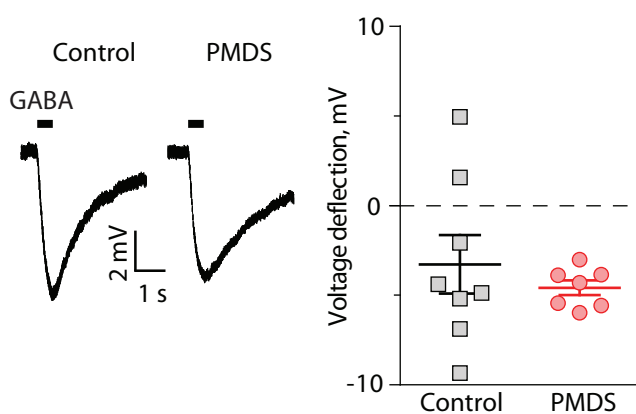

**Voltage deflections induced by GABA application.** Voltage deflections were measured in response to focal applications of  $100 \mu\text{M}$  GABA in cell-attached current-clamp mode from control ( $n = 8$  cells) and PMDS ( $n = 7$  cells) neurons. Data presented as means  $\pm$  s.e.m. This approach allows to detect a significant fraction of changes in membrane potential without perturbing the cytoplasmic composition (Mason et al., 2005, Biophys J; Perkins 2006, J Neurosci Methods; Kirmse et al., 2010, J Neurosci). Recordings were performed using the following solutions (in mM): extracellular, 140 NaCl, 2.5 KCl, 2.5 CaCl<sub>2</sub>, 2 MgCl<sub>2</sub>, 1 NaH<sub>2</sub>PO<sub>4</sub>, 20 glucose, 10 HEPES, pH 7.4; intracellular, 135 CsMeS, 5 CsCl, 10 HEPES, 0.5 EGTA, 1 MgCl<sub>2</sub>, 4 Mg<sub>2</sub>ATP, 0.4 NaGTP, 5 QX-314, pH 7.4.  $R_{\text{pip}} = 5 - 7 \text{ M}\Omega$ ,  $R_{\text{seal}} = 2.8 \pm 0.3 \text{ G}\Omega$ .

## Supplementary Figure 9

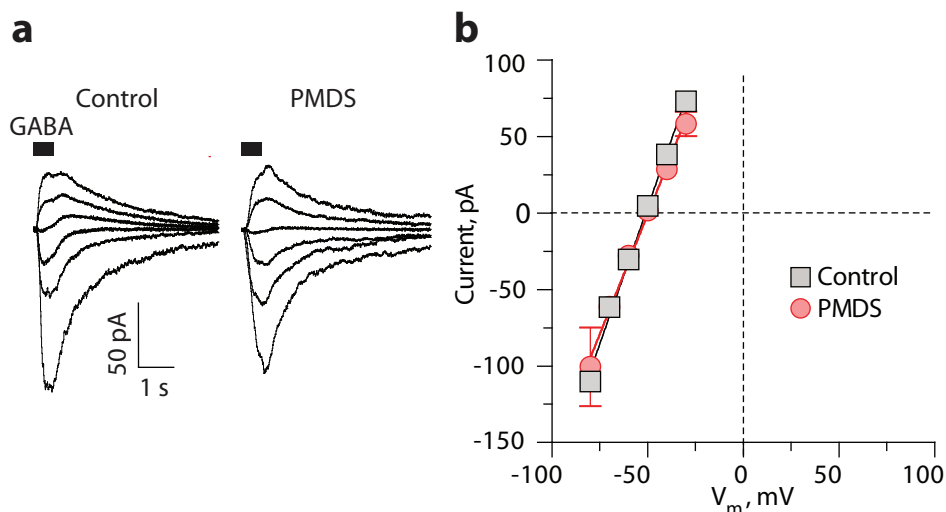

**Currents induced by GABA application.** **a**, Representative current traces measured in control and PMDS neurons at different holding potentials ( $-80 - -30$ ,  $\Delta 10 \text{ mV}$ ) in response to focal applications of  $100 \mu\text{M}$  GABA. **b**, Peak current IV-relationships ( $n = 6$  control and 6 PMDS cells). Data presented as means  $\pm$  s.e.m.

## Supplementary Figure 10

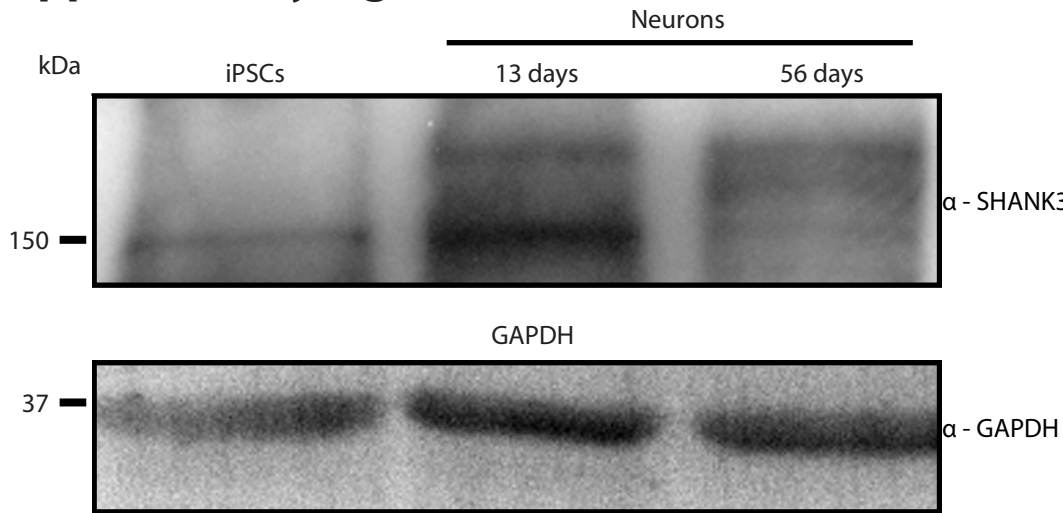

**Expression of SHANK3 proteins at different stages of differentiation.** Western blot analysis using protein lysates extracted from control iPS cells and iPS cell-derived neurons using anti-SHANK3 antibody. GAPDH was used as a loading control.

## Supplementary Figure 11

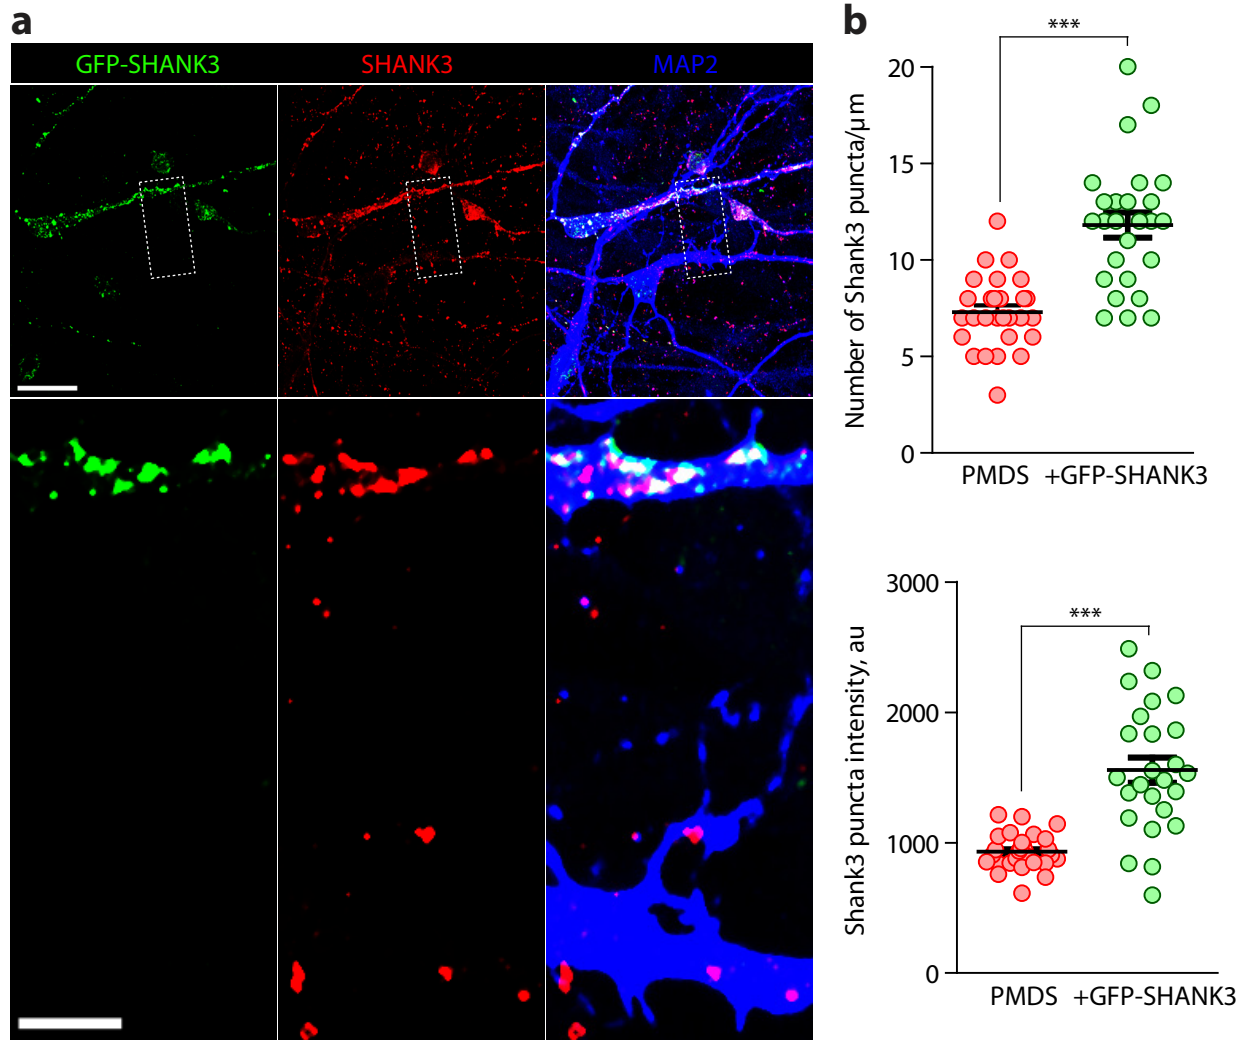

**Characterization of SHANK3 expression in infected PMDS neurons.** **a**, Representative images of PMDS iPS cell-derived neurons infected with GFP-SHANK3 lentivirus and immunostained with antibodies against GFP, SHANK3, and MAP2. Scale bars = 20 (top) and 5 μm (bottom). **b**, Quantification of the number (left) and intensity (right) of SHANK3-positive puncta on neighboring uninfected (n = 28 cells) and GFP-SHANK3 infected (n = 26 cells) PMDS iPS cell-derived neurons. Data presented as means ± s.e.m.; \*\*\* p < 0.001 by Student's t-test

## Supplementary Figure 12

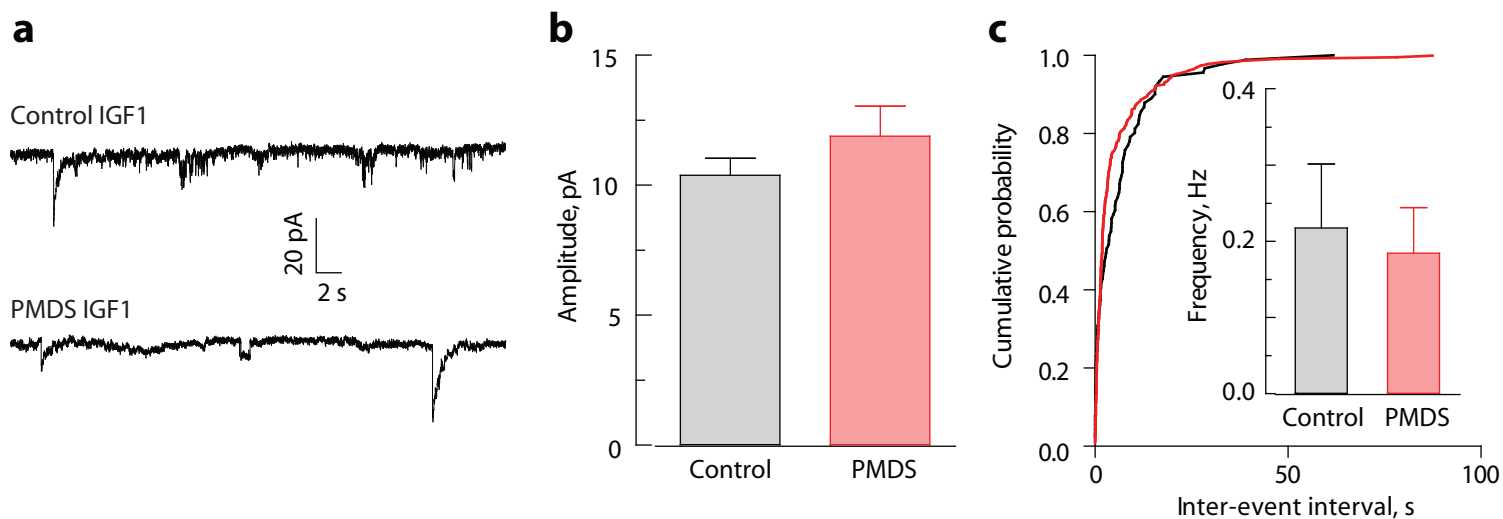

**Characterization of inhibitory synaptic transmission after IGF1 treatment.** **a**, Representative traces of spontaneous IPSCs recorded from co-cultured control and PMDS neurons at -70 mV in the presence of 10  $\mu$ M NBQX and 50  $\mu$ M APV. **b-c**, Quantification of the amplitude (**b**) and frequency (**c**) of spontaneous IPSCs ( $n = 4$  control and 8 PMDS cells). Data presented as means  $\pm$  s.e.m.

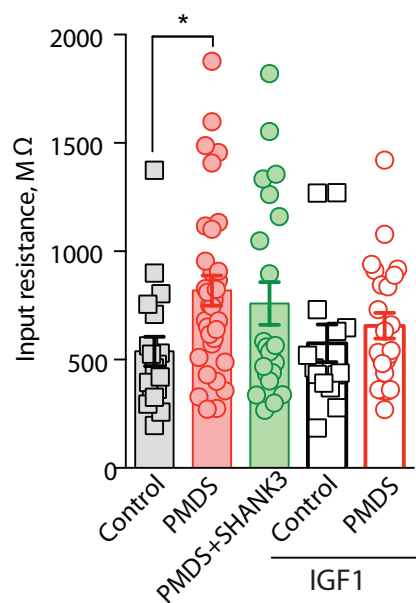

## Supplementary Figure 13

**Measurements of input resistance.** Input resistance was calculated from the current deflections measured in response to a 5 mV hyperpolarizing voltage pulse from  $V_{hold} = -70$  mV (w/o:  $n = 18$  control and 33 PMDS cells; PMDS+SHANK3,  $n = 22$  cells; IGF1,  $n = 14$  control and 23 PMDS cells) in Cs-containing intracellular solution. Data presented as means  $\pm$  s.e.m.; \*  $p < 0.05$ , by Kruskal-Wallis test.

## Supplementary Figure 14

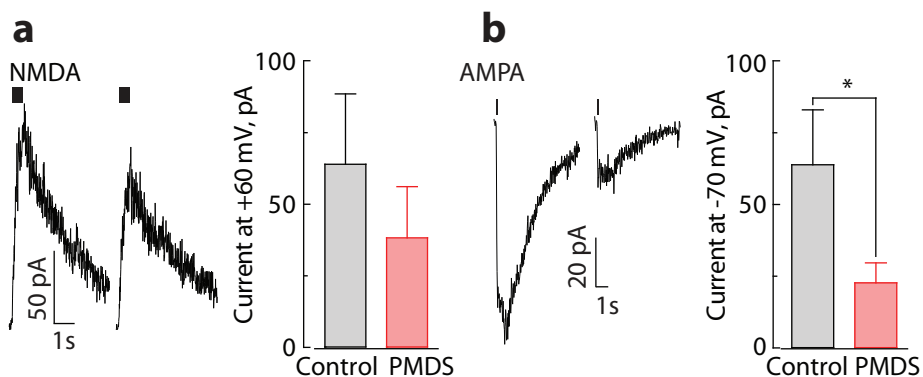

**Currents induced by NMDA and AMPA applications after IGF1 treatment.** **a**, NMDA ( $n = 8$  control and 7 PMDS cells) and **b**, AMPA ( $n = 7$  control and 11 PMDS cells) receptor currents induced by focal applications of 100  $\mu$ M NMDA (**a**) and 200  $\mu$ M AMPA (**b**) in control and PMDS neurons at +60 and -70 mV, respectively. Representative current traces are shown on left; quantification is shown on right. Data presented as means  $\pm$  s.e.m.; \*  $p < 0.05$ , by the Mann-Whitney test.



## Supplementary Figure 15

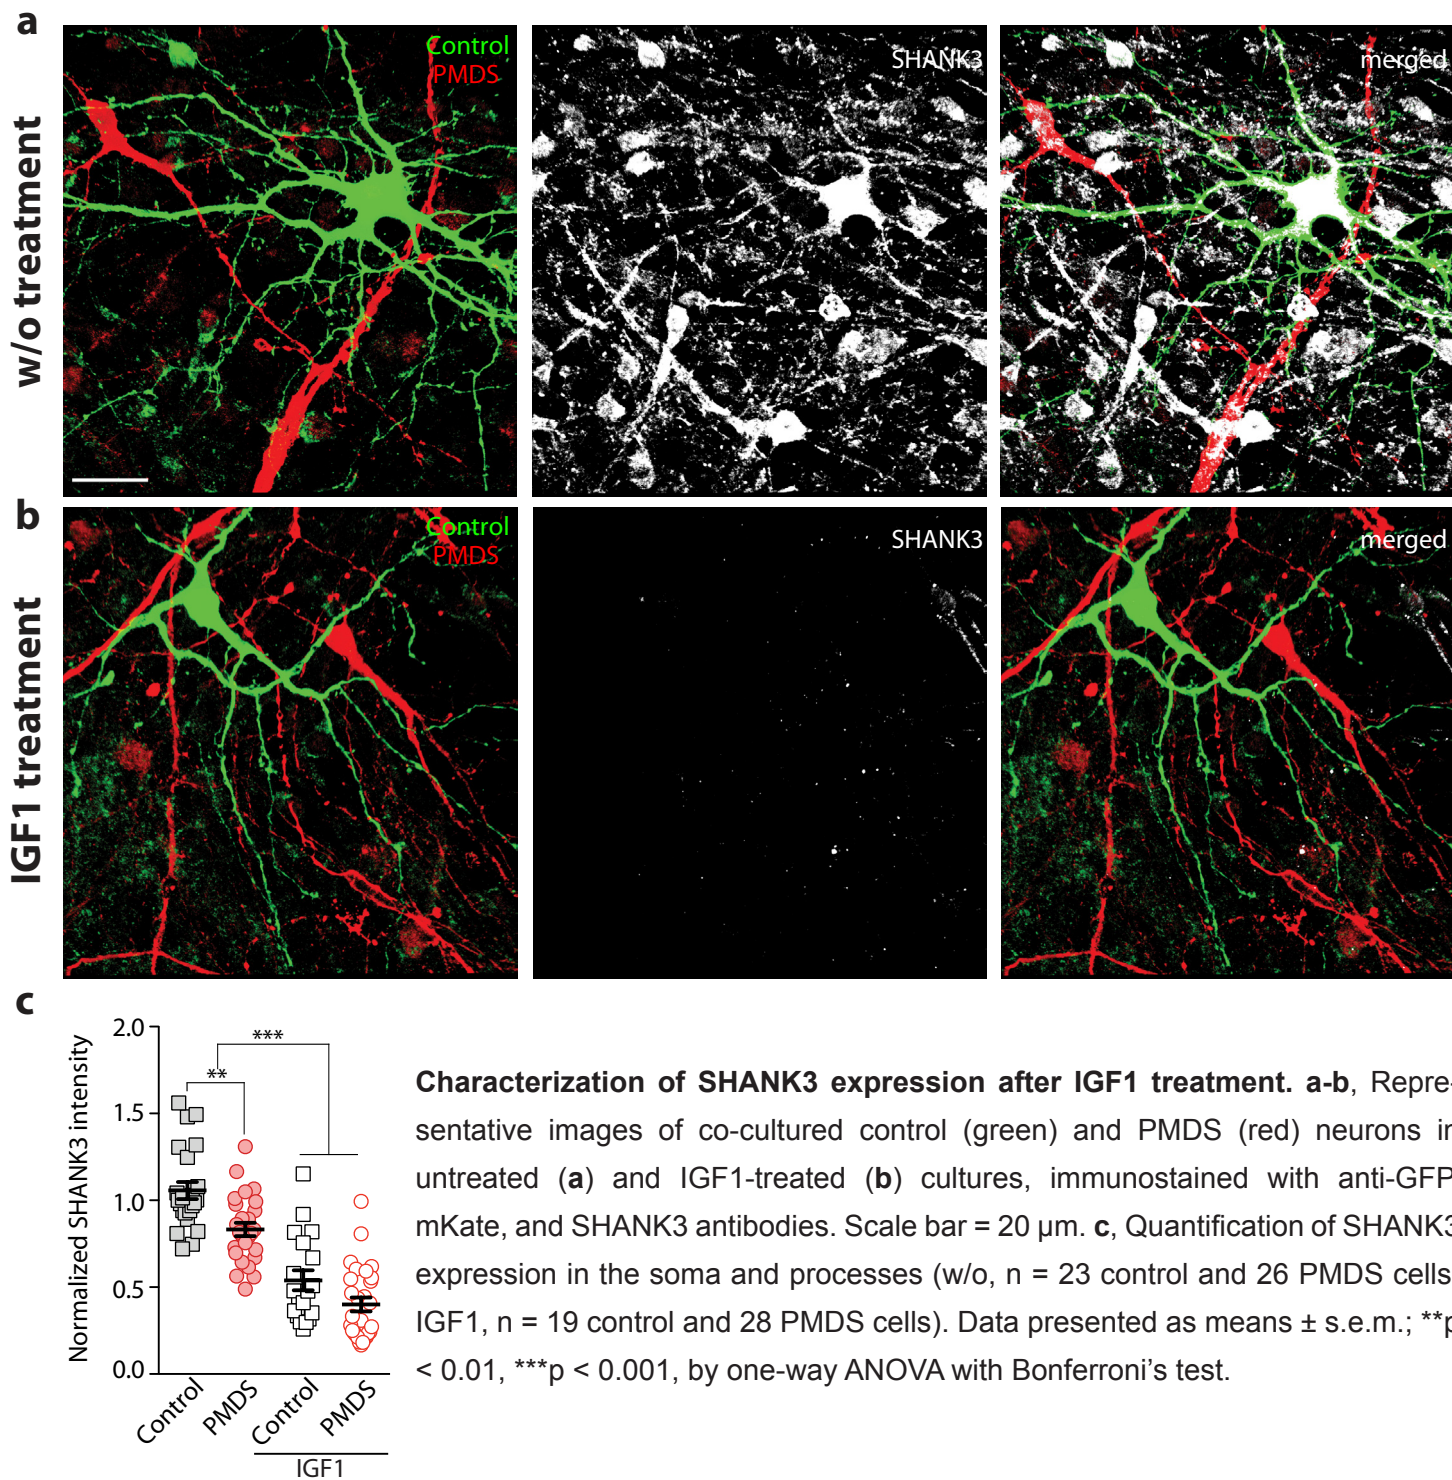

## Supplementary Figure 16

**a** Human iPSC-derived neurons

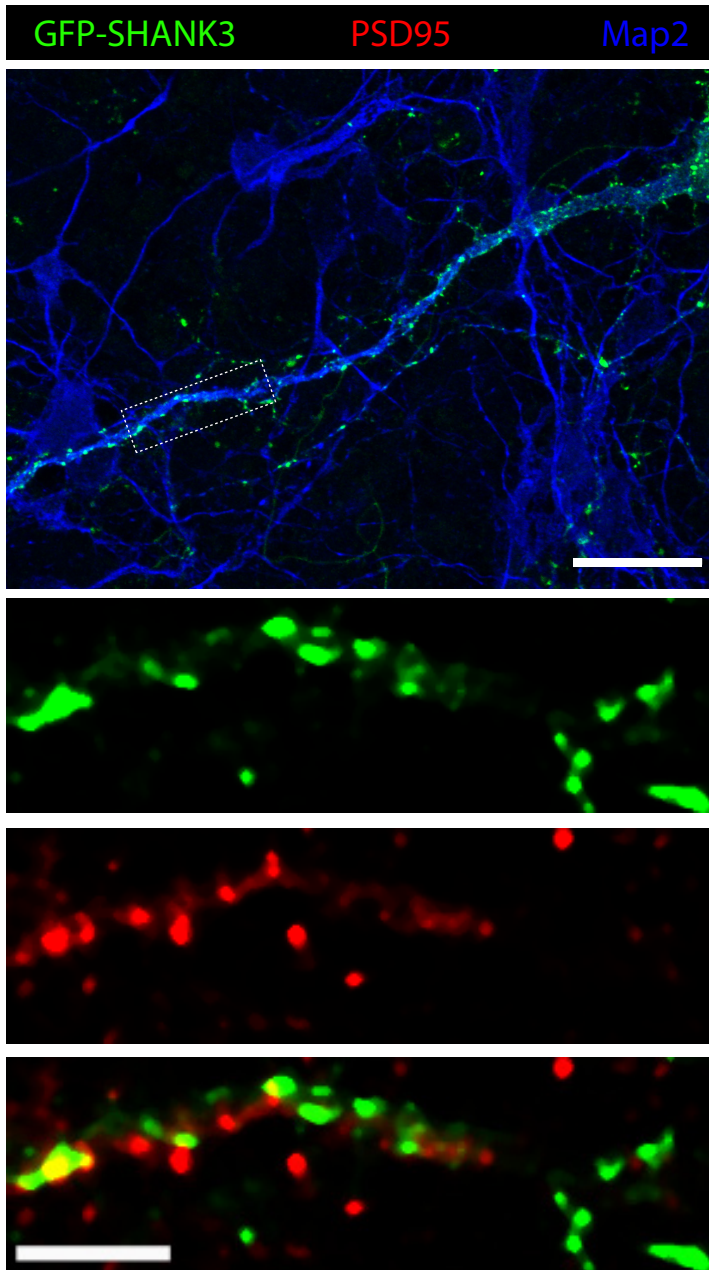

**b** Fetal human brain tissue (frontal lobe)

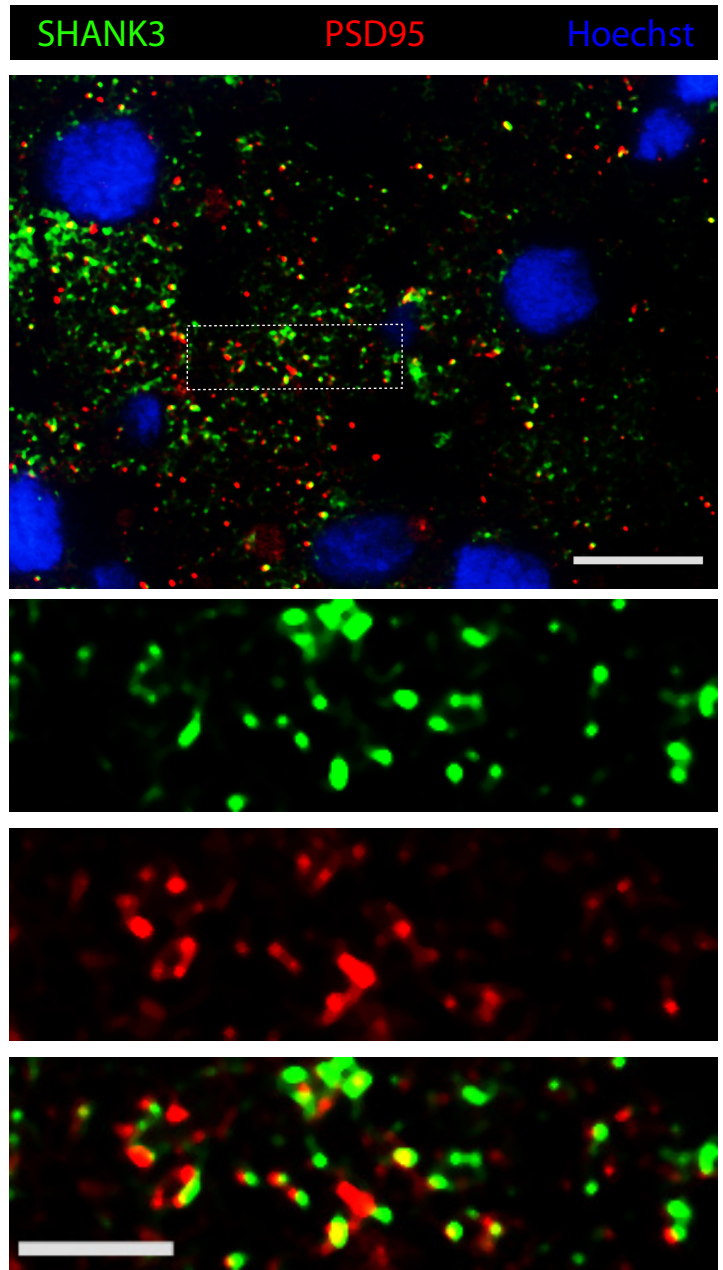

**Localization of SHANK3 and PSD95 proteins in human neurons.** **a**, Representative images of a PMDS iPSC cell-derived neuron infected with GFP-SHANK3 and immunostained with antibodies against GFP, PSD95, and MAP2. **b**, Representative images of a normal fetal human brain tissue (frontal lobe, 37 PGW, Biochain) immunostained with antibodies against SHANK3, PSD95, and Hoechst. Scale bars = 20 (top) and 5 (bottom)  $\mu\text{m}$ .

# Supplementary Table 1

## Characterization of PMDS patients

|                          | Patient 1 (1927)                                                                                                                                                                                | Patient 2 (2631)                                                                                                                  |
|--------------------------|-------------------------------------------------------------------------------------------------------------------------------------------------------------------------------------------------|-----------------------------------------------------------------------------------------------------------------------------------|
| Gender                   | Female                                                                                                                                                                                          | Male                                                                                                                              |
| Age                      | 9 years                                                                                                                                                                                         | 6 years                                                                                                                           |
| Developmental Milestones | First word between 2 and 3 years of age.<br>First phrase between 4 and 5 years.<br>First steps at 21 months                                                                                     | First word between 12 and 18 months.<br>Has not acquired phrase language.<br>First steps at 19 months                             |
| Language                 | Severely impaired with poor articulation, often stereotyped/repetitive, uses some words and verbs, no history of language regression                                                            | Severely impaired, uses fewer than 5 words total, some language regression between 12 and 18 months                               |
| Intellectual disability  | FSIQ - 42, NVIQ- 44, VIQ - 44                                                                                                                                                                   | Intellectually disabled based on parent's report and ADI-R                                                                        |
| Autistic Measures        | ADI-R: Met full Autism criteria on all domains;<br>ADOS: Met Autism Spectrum range on all domains;<br>SRS: Met full Autism Range                                                                | ADI-R: Met full Autism criteria on all domains;<br>ADOS: Met full Autism range on all domains;<br>SRS: Met full Autism Range      |
| Other clinical features  | No history of seizures (has not undergone EEG), reduced pain sensitivity, abnormal gait, no formal psychiatric diagnosis, but possible manic, depressive, and anxiety-related symptoms reported | Epileptiform discharges detected by EEG, but no history of clinical seizure, reduced pain sensitivity, abnormal gait              |
| Treatment                | Risperidone for mood symptoms; Speech therapy, physical therapy, occupational therapy, and behavior therapy                                                                                     | Oxcarbazepine for seizure prophylaxis; Speech therapy, physical therapy, occupational therapy, behavior therapy, and hippotherapy |

FSIQ - Full scale Intelligence Quotient, NVIQ – Nonverbal Intelligence Quotient, VIQ – Verbal Intelligence Quotient per Stanford-Binet, 5th ed.

ADI-R – Autism Diagnostic Interview- Revised, ADOS – Autism Diagnostic Observation Schedule, SRS – Social Responsiveness Scale



# Supplementary Table 2

## Summary of the Multiplex Ligation-dependent Probe Amplification (MLPA) assay

|           | Last probe before deletion    | First probe within deletion    | Last probe within deletion                                                                   | First probe after deletion | Minimum deletion size                                                                                                                                                                                                                                | Maximum possible deletion size                                                            |
|-----------|-------------------------------|--------------------------------|----------------------------------------------------------------------------------------------|----------------------------|------------------------------------------------------------------------------------------------------------------------------------------------------------------------------------------------------------------------------------------------------|-------------------------------------------------------------------------------------------|
|           |                               |                                |                                                                                              |                            | 871 Kb                                                                                                                                                                                                                                               | 4.5 Mb                                                                                    |
|           |                               |                                |                                                                                              |                            | Genes within deletion                                                                                                                                                                                                                                | Genes within deletion                                                                     |
| Patient 1 | 6097-L06370<br>GTSE1<br>exon7 | 6733-L14002<br>ALG12<br>exon10 | 6088-L5543<br>RABL2B<br>exon9                                                                | N/A                        | <i>ALG12, CRELD2, PIM3, IL17REL, TTLL8, MLC1, MOV10L1, PANX2, TRABD, SELO, TUBGCP6, HDAC10, MAPK12, MAPK11, PLXNB2, FAM116B, SAPS2, SBF1, ADM2, MIOX, LMF2, NCAPH2, SCO2, TYMP, ODF3B, KLHDC7B, CPT1B, CHKB, MAPK8IP2, ARSA, SHANK3, ACR, RABL2B</i> | <i>GTSE1_ex7, TRMU, CELSR1, GRAMDD4, CERK, FAM19A5, BRD1, ZBED4, ALG12 through RABL2B</i> |
| Patient 2 | 6097-L06370<br>GTSE1<br>exon7 | 6733-L14002<br>ALG12           | 6786-L6378<br>SHANK3 exon17<br>and ambiguous amplification of<br>6787-L6379<br>SHANK3exon 22 | 67343-L5558<br>RABL2B      | <i>ALG12, CRELD2, PIM3, IL17REL, TTLL8, MLC1, MOV10L1, PANX2, TRABD, SELO, TUBGCP6, HDAC10, MAPK12, MAPK11, PLXNB2, FAM116B, SAPS2, SBF1, ADM2, MIOX, LMF2, NCAPH2, SCO2, TYMP, ODF3B, KLHDC7B, CPT1B, CHKB, MAPK8IP2, ARSA, SHANK3</i>              | <i>GTSE1_ex7, TRMU, CELSR1, GRAMDD4, CERK, FAM19A5, BRD1, ZBED4, ALG12 through SHANK3</i> |

Genomic DNA from all fibroblasts and iPS lines was assayed using MLPA kit P188-B1 22q13 according to the manufacturer's protocol (MRC-Holland, Amsterdam, Netherlands). Minimum deletion size was determined by calculating the distance in base pairs between the unamplified probes. Maximum possible deletion size was determined by calculating the distance between the amplified probes flanking the 22q13 deletion. Probe positions are based on the NCBI36/hg18 genome assembly (<http://genome.ucsc.edu/>)

# Supplementary Table 3

## Summary of performed experiments

| Assays                                                            | Lines | Controls |    |       | Patient1 |         |         |        | Patient2 |        |
|-------------------------------------------------------------------|-------|----------|----|-------|----------|---------|---------|--------|----------|--------|
|                                                                   |       | IM23-9   | H9 | NH1-1 | 1927-12  | 1927-11 | 1927-10 | 1927-8 | 2631-3   | 2631-5 |
| <b>Characterization of iPSCs</b>                                  |       |          |    |       |          |         |         |        |          |        |
| ESC-like morphology                                               |       | +        | +  | +     | +        | +       | +       | +      | +        | +      |
| SKY                                                               |       | +        | +  | +     | +        | +       | +       | +      | +        | +      |
| teratoma formation assay                                          |       | +        | +  | +     | +        | +       |         |        | +        | +      |
| <b>ICC</b>                                                        |       |          |    |       |          |         |         |        |          |        |
| Nanog                                                             |       | +        | +  | +     | +        | +       | +       | +      | +        | +      |
| Tra2-49/6E                                                        |       | +        | +  | +     | +        | +       | +       | +      | +        | +      |
| <b>qRT-PCR</b>                                                    |       |          |    |       |          |         |         |        |          |        |
| Endog. genes                                                      |       | +        | +  | +     | +        | +       | +       | +      | +        | +      |
| Exog. transc. factors                                             |       | +        | +  | +     | +        | +       | +       | +      | +        | +      |
| <b>Characterization of neurons</b>                                |       |          |    |       |          |         |         |        |          |        |
| qRT-PCR                                                           |       | +        | +  | +     | +        |         | +       | +      | +        | +      |
| Single cell qRT-PCR                                               |       | +        | +  | +     | +        | +       | +       | +      | +        | +      |
| ICC (Map2, huNu)                                                  |       | +        | +  |       | +        | +       |         |        | +        | +      |
| ICC (Tbr1, Ctip2, Satb2, GAD)                                     |       | +        | +  |       | +        | +       |         |        | +        | +      |
| Western blot                                                      |       | +        | +  |       | +        |         |         |        | +        |        |
| Electrophysiology (intrinsic)                                     |       | +        | +  | +     | +        | +       | +       | +      | +        | +      |
| <b>Characterization of synaptic properties: electrophysiology</b> |       |          |    |       |          |         |         |        |          |        |
| <b>separate culture</b>                                           | w/o   | +        | +  | +     |          | +       | +       | +      | +        | +      |
| <b>co-culture</b> EPSCs                                           | w/o   | +        | +  |       | +        | +       |         |        | +        | +      |
|                                                                   | IGF1  | +        | +  |       | +        | +       |         |        | +        |        |
| IPSCs                                                             | w/o   | +        | +  |       | +        | +       |         |        | +        |        |
|                                                                   | IGF1  | +        | +  |       | +        |         |         |        | +        |        |
| AMPA application                                                  | w/o   | +        | +  |       | +        | +       |         |        | +        |        |
|                                                                   | IGF1  | +        | +  |       | +        | +       |         |        | +        |        |
| NMDA application                                                  | w/o   | +        | +  | +     | +        | +       | +       | +      | +        | +      |
|                                                                   | IGF1  | +        | +  |       | +        | +       |         |        | +        |        |
| GABA application                                                  | w/o   | +        | +  |       | +        | +       |         |        | +        |        |
| Shank3 rescue                                                     | w/o   |          |    |       | +        |         |         |        | +        |        |
| <b>ICC</b>                                                        |       |          |    |       |          |         |         |        |          |        |
| Synapsin1-Homer1                                                  | w/o   | +        | +  |       | +        | +       |         |        | +        |        |
|                                                                   | TSA   | +        |    |       | +        | +       |         |        | +        |        |
|                                                                   | VPA   | +        |    |       | +        | +       |         |        | +        |        |
|                                                                   | Nif   | +        |    |       |          |         |         |        | +        |        |
|                                                                   | IGF1  | +        | +  |       | +        | +       |         |        | +        |        |
|                                                                   | IGF2  | +        | +  |       | +        | +       |         |        | +        |        |
| Shank3                                                            | w/o   | +        | +  |       | +        | +       |         | +      | +        |        |
|                                                                   | IGF1  |          | +  |       | +        | +       |         |        | +        |        |
| PSD-95                                                            | w/o   |          | +  |       | +        |         |         |        | +        |        |
|                                                                   | IGF1  |          | +  |       | +        |         |         |        | +        |        |

(+) - lines that were used for indicated experiments

# Supplementary Table 4

Characterization of functional properties of PMDS and control iPSC-derived neurons cultured separately without astrocytes

| Intrinsic properties          |         |      |          |          |       |      |          |          |             |
|-------------------------------|---------|------|----------|----------|-------|------|----------|----------|-------------|
|                               | control |      |          |          | PMDS  |      |          |          | Statistics  |
|                               | Mean    | SEM  | N, cells | N, lines | Mean  | SEM  | N, cells | N, lines | P value     |
| Number of APs at threshold    | 3.6     | 0.7  | 22       | 3        | 2.4   | 0.3  | 38       | 5        |             |
| AP <sub>Thr</sub> , mV        | -44.4   | 1.4  | 22       | 3        | -44.5 | 1.0  | 38       | 5        |             |
| AP <sub>ampl</sub> , mV       | 60.8    | 2.5  | 22       | 3        | 58.4  | 1.9  | 38       | 5        |             |
| AP width <sub>Thr</sub> , ms  | 6.9     | 0.3  | 22       | 3        | 6.9   | 0.4  | 38       | 5        |             |
| AP width <sub>Half</sub> , ms | 2.9     | 0.1  | 22       | 3        | 2.9   | 0.2  | 38       | 5        |             |
| AP dV/dt, mV/ms               | 46.2    | 2.7  | 22       | 3        | 47.3  | 2.7  | 38       | 5        |             |
| RMP, mV                       | -53.4   | 1.9  | 22       | 3        | -50.7 | 1.7  | 38       | 5        |             |
| R <sub>in</sub> , GΩ          | 1.60    | 0.15 | 22       | 3        | 2.75  | 0.25 | 38       | 5        | ***, 0.0003 |
| C <sub>m</sub> , pF           | 34.9    | 3.2  | 22       | 3        | 27.4  | 2.6  | 38       | 5        |             |
| τ <sub>m</sub> , ms           | 55.6    | 6.4  | 22       | 3        | 67.0  | 7.9  | 38       | 5        |             |
| Synaptic properties           |         |      |          |          |       |      |          |          |             |
| Amplitude, pA                 | 19.4    | 2.7  | 19       | 3        | 10.0  | 0.8  | 26       | 5        | ***, 0.0002 |
| Frequency, Hz                 | 0.24    | 0.05 | 19       | 3        | 0.10  | 0.02 | 26       | 5        | ***, 0.001  |

Abbreviations: AP - action potential; AP<sub>Thr</sub> – AP threshold, measured from the phase-plane plot; AP<sub>ampl</sub> – AP amplitude, calculated as a difference between the threshold and the peak of AP; AP width<sub>Th</sub> – AP width measured at the threshold; AP width<sub>Half</sub> – AP width measured at the half of AP amplitude; AP dV/dt - the rate of the AP rise, calculated for the first AP measured in response to increasing current injections; RMP – resting membrane potential, measured right after brake-in into the cell and corrected for the liquid junction potential (-22 mV); R<sub>in</sub> – input resistance, measured from the linear voltage deflection in response to negative and positive current injections around V<sub>hold</sub> = -60 – -75 mV, C<sub>m</sub> - membrane capacitance, calculated as the ratio of τ<sub>on</sub> and R<sub>in</sub>. Significance tested with the Mann-Whitney test.

Spontaneous synaptic activity was recorded for 3 min at -70 mV. EPSCs were detected using a template created in Clampfit 10 by averaging at least 50 events recorded in the presence of 50 μM picrotoxin.

iPSC-derived neurons were recorded using the following extracellular and intracellular solutions ( in mM): 140 NaCl, 2.5 KCl, 2.5 CaCl<sub>2</sub>, 2 MgCl<sub>2</sub>, 1 NaH<sub>2</sub>PO<sub>4</sub>, 20 Glucose, 10 HEPES, pH 7.4 (extracellular); 120 KGluc, 20 KCl, 4 NaCl, 4 Mg<sub>2</sub>ATP, 0.3 NaGTP, 10 Na<sub>2</sub>PCr, 0.5 EGTA, 10 HEPES, pH 7.25 (intracellular)



# Supplementary Table 5

## List of primers used for qRT-PCR

| Symbol           | Forward primer              | Reverse primer              | Accession number <sup>1</sup> |
|------------------|-----------------------------|-----------------------------|-------------------------------|
| 18S              | GATGGGCGGCGGAAAATAG         | GCGTGGATTCTGCATAATGGT       | 11968182a1                    |
| GAPDH            | CATGAGAAGTATGACAACAGCCT     | AGTCCTTCCACGATACCAAAGT      | 7669492a3                     |
| OCT3/4 exogenous | CCCCAGGGCCCCATTTTGGTACC     | TTATCGTCGACCACTGTGCTGCTG    |                               |
| SOX2 exog        | GGCACCCCTGGCATGGCTCTTGG CTC | TTATCGTCGACCACTGTGCTGCTG    |                               |
| MYC exog         | CTGAAGAGGACTTGTTCGGAAAC     | TTATCGTCGACCACTGTGCTGCTG    |                               |
| KLF4 exog        | CCCACACAGGTGAGAAACCTTACC    | TTATCGTCGACCACTGTGCTGCTG    |                               |
| OCT3/4           | GACAGGGGGAGGGGAGGAGCTAG G   | CTTCCCTCCAACCAGTTGCCCAA AC  |                               |
| SOX2             | GGGAAATGGGAGGGGTGCAAAG AGG  | TTGCGTGAGTGTGGATGGGATTG GTG |                               |
| MYC              | GCGTCCTGGGAAGGGAGATCCGG AGC | TTGAGGGGCATCGTCGCGGGAG GCTG |                               |
| KLF              | CCCACACAGGTGAGAAACCTTACC    | GTAGTGCTTTCTGGCTGGGCTC      |                               |
| NANOG            | CAGTCTGGACACTGGCTGAA        | CTCGCTGATTAGGCTCCAAC        |                               |
| LIN28            | GAAATCCACAGCCCTACCCT        | CTCTGCCTGCTCCTCAAAC         |                               |
| REX1             | CAGATCCTAACAGCTCGCAGAAT     | GCGTACGCAAATTAAGTCCAGA      |                               |
| SHANK1           | AGTTCCGATACAAGACCCGAG       | CCGAGCTGCACATACTCCA         | 11968152a2                    |
| SHANK2           | TGAAGGAGTCTCAACAGGGAC       | CCTGGTGACCGTAGGGAAG         | 19743794a3                    |
| SHANK3ex2-3      | AGGACGCGCTCAACTATGG         | CTCGCCGCTTGTATCGAACT        | 122937240b1                   |
| SHANK3ex8-9      | GTCCTGCTCTTCCGTGGAG         | TGGGTCTTGATAACCTCTGCAA      | 122937240b3                   |
| SHANK3ex22       | GGAGAGCGGGGAACACTACT        | CTGTCCGAGGACTGCTTCAG        | 13359173a1                    |
| SYNAPSIN1        | TGAAGCCGGATTTTGTGCTGA       | GACCAAACCTGCGGTAGTCTCC      | 9924097a2                     |
| PCLO             | CAGACACTTTCAGGTCAGAGC       | AGGCATCATACTAGACTTGTGCT     | 6433936a2                     |
| BSN              | CCACATCACCCACTCCGTC         | TTGCAGACCTTGTGTGACAC        | 4508019a1                     |
| DSCAM            | TTTTACGGGAGCCCTATACAGT      | GCAACATTGCCTCTCATGGTTT      | 3169768a1                     |
| PSD95-DLG4       | TCACAACCTCTTATTCCCAGCA      | CATGGCTGTGGGGTAGTCG         | 1527215a1                     |
| PSD93-DLG2       | GGCCTGGGATTCAGTATTGCT       | CCCGCAAGATACAATCATTGACC     | 4557527a2                     |
| GEPHYRYN         | TGCCATTGACCTTTTACGTGAT      | ACAGCAGGACTGGTGTAGAAT       | 10880983a1                    |
| GRIN1            | AGGAACCCCTCGGACAAGTT        | CCGCACTCTCGTAGTTGTG         | 11496971a1                    |

|              |                         |                          |            |
|--------------|-------------------------|--------------------------|------------|
| GRIN2A       | GGGCTGGGACATGCAGAAT     | CGTCTTTGGAACAGTAGAGCAA   | 4504125a3  |
| GRIN2B       | GTAGCCATGAATGAGACCGAC   | GGATCGGGGTGAGAGTCTGT     | 4504127a1  |
| GRIN3A       | GACGCCCTCCTATTTGCCG     | CCACGGTATGGCACACACT      | 18916849a1 |
| MAPT-Tau     | TACAAACCAGTTGACCTGAGCA  | ATGGATGTTGCCTAATGAGCC    | 8400715a3  |
| TUBB3        | CGGTGGTGGAAACCCTACAAC   | AGGTGGTGACTIONCCGCTCAT   | 5174737a1  |
| DCX          | CCTTGGCTAGCAGCAACAGT    | CCACTGCGGATGATGGTAA      |            |
| NCAM         | ACATCACCTGCTACTTCCTGA   | CTTGGACTCATCTTTTCGAGAAGG | 10834990a1 |
| NSE          | GGAGTTGGATGGGACTGAGAA   | CTGAGCAATGTGGCGATACAG    | 5803011a3  |
| TIS21-BTG2   | CAGAGCACTACAAACACCACTG  | CTGAGTCCGATCTGGCTGG      | 5802988a1  |
| FOXG1        | GCCACAATCTGTCCCTCAACA   | CGGGTCCAGCATCCAGTAG      | 32307177a3 |
| TLE1         | AAGTTCACTATCCCGGAGTCC   | TCTGTCTTTTCACTTGCCAGTTT  | 21541824a1 |
| UNC5D        | AAGCCCTTCCCGAATCCATC    | AGTGCAATAGGGTTGCTCTTG    | 18254472a1 |
| MEF2c        | ATGCCATCAGTGAATCAAAGGAT | CTGGTAAAGTAGGAGTTGCTACG  | 298698a1   |
| CUX1         | GCTCTCATCGGCCAATCACT    | TCTATGGCCTGCTCCACGT      |            |
| PLXND1       | CATGGAGATGGCCTGTGACTA   | GGAAGGGCGGAAACTGGTC      | 3327054a1  |
| ETV1         | CTGGATGACCCGGCAAATTCT   | CCTCTTCAGGCTCAATCAGTTT   | 1045061a3  |
| SATB2        | TCTCCCCTCAGTTATGTGAC    | AGGCAAGTCTTCCAACCTTTGAA  | 5689405a3  |
| SYT9         | TGGCAGACGACTGAAGAAGAG   | GGATTTGGTCAATGTTCTCGGG   | 28376627a2 |
| S100A10      | GGACCAGTGTAGAGATGGCAA   | ATGGTGAGGCCCGCAATTA      |            |
| OMA1         | TAGGCAGGGGCATAAGGAAAT   | CTCAAACCAAGGAATAGCTTCCA  | 21686999a3 |
| PCP4         | GCTGGGCCAACCAATGGAA     | CACGTTCTGTCTCTGGTGCAT    | 5453858a1  |
| CRIM1        | GCGTTTGCGAAGATGAGAACT   | TGGTGTTACATTACATTTCCCA   | 10092639a1 |
| SOX5         | CAGAGTGGCGAGTCCTTGTC    | TTTCTTCCGGCTCGTTTTTGA    | 23308715a3 |
| DKK3         | TGGGGTCACTGCACCAAAT     | GAAGGTCGGCTTGCACACATA    | 27735014a1 |
| NR4A3        | CTGAGCATGTGCAACAATTCTAC | ACAGCTCCAAAAGGCTGATTC    | 1311505a2  |
| TLE4         | ACAAGCAGGCAGAGATTGTCA   | TCCATGTGATAAATGCTGGGC    | 6330948a1  |
| LXN          | AACGGGACAAGAACTGCAC     | CTAGCGGTTCTTCATGGACT     | 21359933a3 |
| SEMA3E       | ATTGTTTGCTGGACTCTACAGT  | CTTCAACAGACGCTCATCGT     | 6912650a3  |
| TBR1         | GCCTTTCTCCTTCTATCATGCTC | GTCAGTGGTCGAGATAATGGGA   | 5730081a1  |
| FOXP1        | AGACAAAAGTAACGGTTCAGCC  | CGCACTCTAGTAAGTGGTTGC    | 21750965a3 |
| FOXP2        | TTTCTAAGAACGCGAACGTCT   | GCAATATGCACTTACAGGTTTGG  | 21518701a2 |
| CTIP2-BCL11B | TGGGTGCCTGCTATGACAAG    | GGCTCGGACACTTTCCTGAG     | 12597635a1 |

|                 |                         |                          |            |
|-----------------|-------------------------|--------------------------|------------|
| DLX5            | AGCTCCTACCACCAGTACGG    | GTTTGCCATTACCACTTCTCAC   | 4885187a3  |
| PPP1R1B-DARPP32 | AGTCTGCTGGGCAAAGACAA    | AGGCTCACTTAGTGCTGGGT     | 21735492a2 |
| DRD1            | AGGGACTTCTCTGTTTCGTATCC | GTCGGAACCTGATAACGGCAG    | 4503383a1  |
| DRD2            | CAACGGGTCAGACGGGAAG     | CTCCAGGTAGACAACCCAGG     | 17986270a3 |
| TH              | GCCCTACCAAGACCAGACGTA   | CGTGAGGCATAGCTCCTGA      | 37127a2    |
| DDC             | ACTGGCTCGGGAAGATGCT     | CCGATGGATCACTTTGGTCC     | 4503281a1  |
| DBH             | CTGAAGCCCAATATCCCCGAA   | GTAGCACCAGTACGTGGTCTC    | 18426906a3 |
| CRYGS           | TGACTGTGATTGCGACTGTG    | GCAAAGTTGGGCCTTTCATAAAC  | 8922120a1  |
| TPM2            | CTGAGACCCGAGCAGAGTTTG   | TGAATCTCGACGTTCTCCTCC    | 4507649a1  |
| PCP2            | AGAGGCCAGCAGAAAAGTGACT  | GTGGCTCAGCAGATTGAAGAA    |            |
| GRP             | GTGGGGCACTTAATGGGGAAA   | CTATGAGACCCAGCAAATTCCTT  | 31542860a1 |
| DLX1            | CCATGCCAGAAAGTCTCAACA   | GGCCCAAACCTCATAAACACC    | 31418473a3 |
| GAD67           | GCCAGACAAGCAGTATGATGT   | CCAGTTCCAGGCATTTGTTGAT   | 4503873a2  |
| VGAT            | CCGAGTGGTGAACGTAGCG     | GTGGCGATAATGGACCAGGAC    | 17999520a3 |
| CALB2           | TCAGAGATGTCCCGACTCCTG   | GCCGCTTCTATCCTTGTCGTAA   | 4502543a1  |
| PVALB           | GCTGAACGCTGAGGACATCAA   | TCACATCATCCGCACTCTTTTTTC | 4506335a1  |
| SOMATOST        | GCTGCTGTCTGAACCCAAC     | CGTTCTCGGGGTGCCATAG      | 4507243a1  |
| VGLUT1          | CGACGACAGCCTTTTGTGGT    | GCCGTAGACGTAGAAAACAGAG   | 9945322a2  |
| VGLUT2          | GGGAGACAATCGAGCTGACG    | CAGCGGATACCGAAGGAGATG    | 9966811a1  |
| VGLUT3          | AAACCGGAAATTCAGACAGCA   | CCAAAGACCCTGTTAGCAGCA    | 21322234a2 |
| SLC1A2          | AAGTGCGAATGCCAGACAGTC   | CAGGATGACACCAAACACCG     | 4759124a1  |
| NEUROD1         | ATGACCAAATCGTACAGCGAG   | GTTTCATGGCTTCGAGGTCGT    | 4505377a1  |

<sup>1</sup>Athanasia Spandidos, Xiaowei Wang, Huajun Wang and Brian Seed: PrimerBank: a resource of human and mouse PCR primer pairs for gene expression detection and quantification. Nucl. Acids Res. 2010 38:D792-9. <http://pga.mgh.harvard.edu/primerbank>

## References

- 1 Chambers, S. M. *et al.* Highly efficient neural conversion of human ES and iPS cells by dual inhibition of SMAD signaling. *Nat Biotechnol* **27**, 275-280, doi:10.1038/nbt.1529 (2009).
- 2 Gaspard, N. *et al.* Generation of cortical neurons from mouse embryonic stem cells. *Nat Protoc* **4**, 1454-1463, doi:10.1038/nprot.2009.157 (2009).
- 3 Chen, Y. *et al.* NS21: re-defined and modified supplement B27 for neuronal cultures. *J Neurosci Methods* **171**, 239-247, doi:10.1016/j.jneumeth.2008.03.013 (2008).
- 4 Zhang, F. *et al.* Multimodal fast optical interrogation of neural circuitry. *Nature* **446**, 633-639, doi:10.1038/nature05744 (2007).
- 5 Mason, M. J., Simpson, A. K., Mahaut-Smith, M. P. & Robinson, H. P. The interpretation of current-clamp recordings in the cell-attached patch-clamp configuration. *Biophys J* **88**, 739-750, doi:10.1529/biophysj.104.049866 (2005).
- 6 Perkins, K. L. Cell-attached voltage-clamp and current-clamp recording and stimulation techniques in brain slices. *J Neurosci Methods* **154**, 1-18, doi:10.1016/j.jneumeth.2006.02.010 (2006).
- 7 Kirmse, K., Witte, O. W. & Holthoff, K. GABA depolarizes immature neocortical neurons in the presence of the ketone body ss-hydroxybutyrate. *J Neurosci* **30**, 16002-16007, doi:10.1523/JNEUROSCI.2534-10.2010 (2010).
- 8 Spandidos, A., Wang, X., Wang, H. & Seed, B. PrimerBank: a resource of human and mouse PCR primer pairs for gene expression detection and quantification. *Nucleic Acids Res* **38**, D792-799, doi:10.1093/nar/gkp1005 (2010).
